# Supplementary material for: Enhancing the Accuracy of Measuring DEP Force Applied on Cells by Considering the Friction Effect
Source: MDPI journal article supplement (doi:10.3390/bios13050540), 2023-05-12
Supplement: s1 [file s1]

# Enhancing the Accuracy of Measuring DEP Force Applied on Cells by Considering the Friction Effect

Alireza Khouzestani <sup>1</sup>, Yousef Hojjat <sup>1,\*</sup>, Marziyeh Tavalaei <sup>2</sup>, Hesam Sadeghian <sup>1</sup>  
and Mohammad Hossein Nasr-Esfahani <sup>2,3,\*</sup>

<sup>1</sup> Department of Mechanical Engineering, Tarbiat Modares University, Tehran 14115-175, Iran; a.khouzestani@modares.ac.ir (A.K.); hesam.sadeghian@modares.ac.ir (H.S.)

<sup>2</sup> Department of Animal Biotechnology, Reproductive Biomedicine Research Center, Royan Institute for Biotechnology, ACECR, Isfahan 8165131378, Iran; m.tavalaei@royan-rc.ac.ir

<sup>3</sup> Isfahan Fertility and Infertility Center, Isfahan 8158858151, Iran

\* Correspondence: yhojjat@modares.ac.ir (Y.H.); mh.nasr-esfahani@royaninstitute.org (M.H.N.-E.)

## 1. Fluid Flow Distribution in the Microchannel

Figure S1 presents a schematic view of a microchannel with a cell inside.

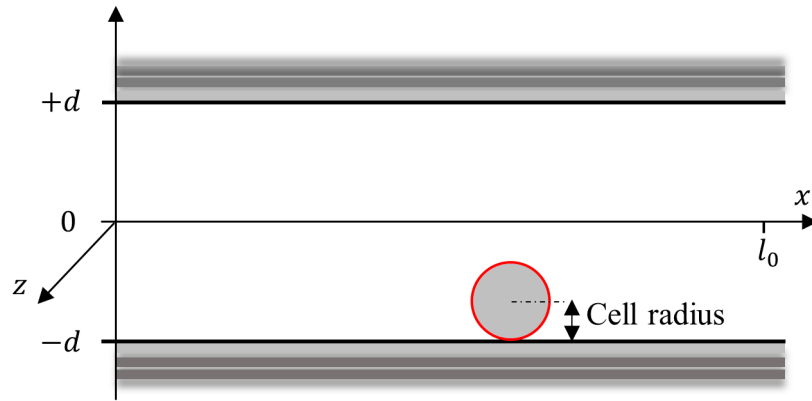

**Figure S1.** Schematic view of the microchannel.

By solving the Navier Stokes equations, Fluid flow velocity distribution in a rectangular microchannel is described in equation (S1) [1]:

$$U_x = \frac{1}{2\eta} \frac{p_0}{l_0} (d^2 - y^2) \quad (S1)$$

$p_0$  and  $\eta$  are inlet pressure and fluid viscosity.  $2d$ ,  $w$ , and  $l_0$  are the height, width, and length of the microchannel, respectively. Also, the microchannel width in the  $z$  direction is much larger than its height ( $w \gg 2d$ ). Equation (1) indicates that a parabolic flow develops across the channel height.

On the wall of the microchannel, where  $y = d$ , fluid velocity will be zero. The maximum velocity is obtained in the middle of the channel, where  $y = 0$ .

For calculating the fluid velocity in the microchannel cross-section, the radius of the cells was considered as the height location, which was  $3.6 \mu\text{m}$  for WBC and  $2.5 \mu\text{m}$  for sperm. So, the drag force on the cells was measured by assessing the fluid velocity in the mentioned location.

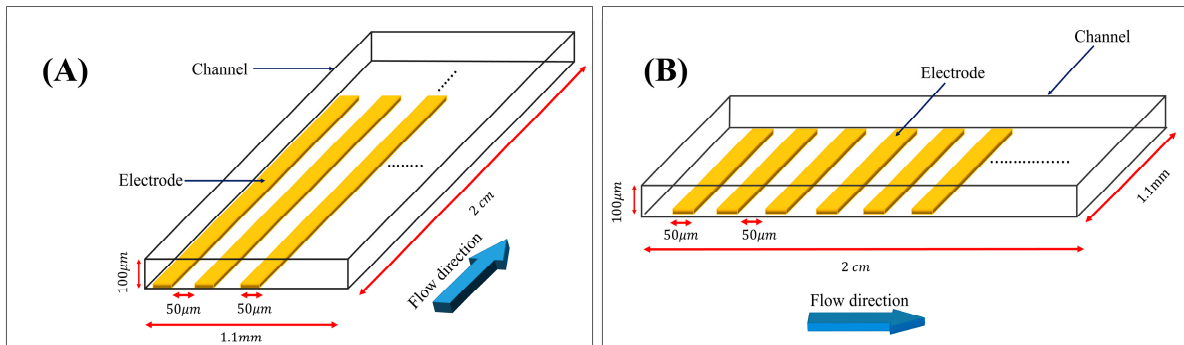

**Figure S2.** Electrodes and channel in (A) parallel and (B) perpendicular arrangements.

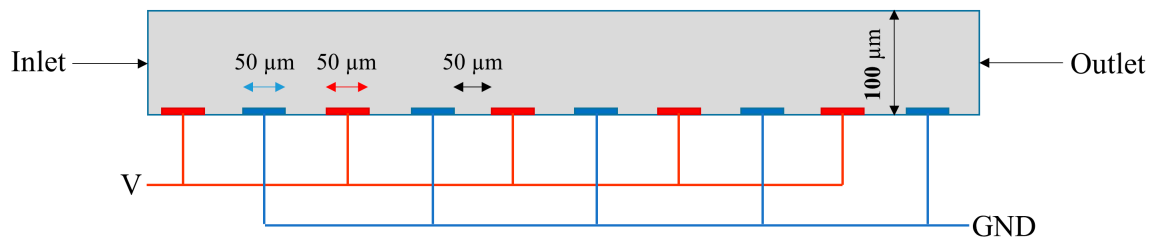

**Figure S3.** Simulation boundary conditions.

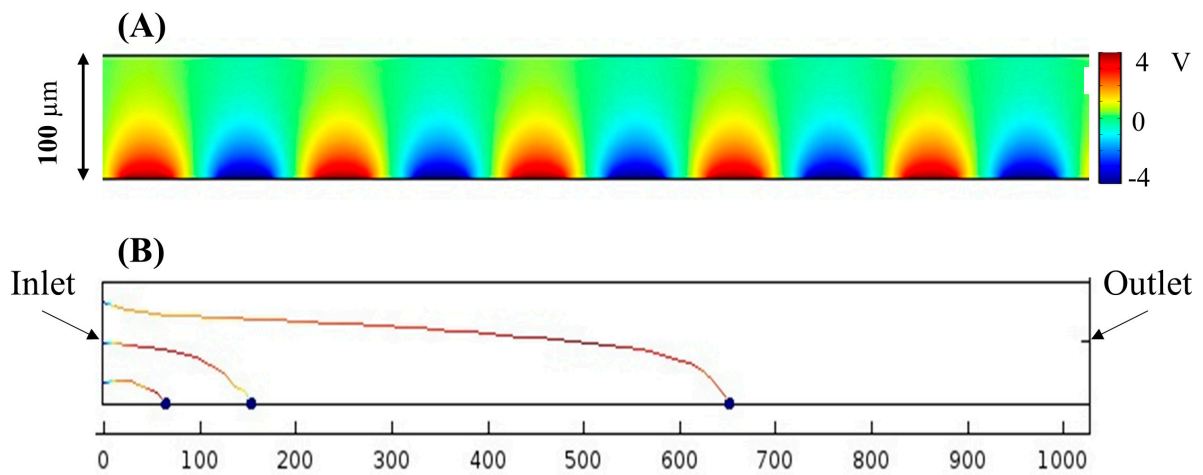

**Figure S4.** Simulation results (A) Electric Potential and (B) particle pathway in  $V_{pp} = 8$  V and fluid velocity of 0.6 mm/s.

### Supplementary Movies

**Movie S1.** Trapping the sperms by DEP force in the flow rate of 0.1 ml/h and then letting them move away by setting the voltage to 0 (Perpendicular arrangement).

**Movie S2.** Trapping the sperms by DEP force in the flow rate of 0.02 ml/h and then letting them move away by setting the voltage to 0 (Parallel arrangement).

### Reference

36. Bruus, H. Lecture Notes Theoretical Microfluidics. *Physics* **2008**, *18*, 363.
